1  
2  
3  
4  
5  
6  
7  
8  
9  
10  
11  
12  
13  
14  
15  
16  
17  
18  
19

## **Rubisco activase remodels plant Rubisco via the large subunit N-terminus**

Jediael Ng and Oliver Mueller-Cajar\*

School of Biological Sciences, Nanyang Technological University, 60 Nanyang Drive,  
Singapore 637551. Singapore

\*Correspondence: [cajar@ntu.edu.sg](mailto:cajar@ntu.edu.sg)

**Running title:** Mechanism of Rubisco activase

### **Author Contributions**

J. N. designed research and performed the experiments. J. N. and O.M.-C. wrote the article.

### **KEYWORDS**

Rubisco, Rubisco activase, ATPases associated with diverse cellular activities (AAA), photosynthesis,  
molecular chaperone, carbon fixation

20 **ABSTRACT**

21 The photosynthetic CO<sub>2</sub> fixing enzyme ribulose 1,5-bisphosphate carboxylase/oxygenase (Rubisco)  
22 forms inhibited complexes with multiple sugar phosphates, including its substrate ribulose 1,5-  
23 bisphosphate. At least three classes of ATPases associated with diverse cellular activities (AAA+  
24 proteins) termed Rubisco activases (Rcas) have evolved to remodel inhibited Rubisco complexes. The  
25 mechanism of green-type Rca found in higher plants has proved elusive, because until recently higher  
26 plant Rubiscos could not be expressed recombinantly. Towards identifying interaction sites between  
27 Rubisco and Rca, here we produce and characterize a suite of 33 Arabidopsis Rubisco mutants for  
28 their ability to be activated by Rca. We find that Rca activity is highly sensitive to truncations and  
29 mutations in the conserved N-terminus of the Rubisco large subunit. Both T5A and T7A substitutions  
30 cannot be activated by Rca, but present with increased carboxylation velocities. Our results are  
31 consistent with a model where Rca functions by transiently threading the Rubisco large subunit N-  
32 terminus through the axial pore of the AAA+ hexamer.

33

34

## 35 INTRODUCTION

36 Virtually all carbon dioxide that enters the biological world does so via the Calvin Benson Bassham  
37 cycle (1). Aerobic autotrophic organisms such as plants, algae and cyanobacteria all utilize this  
38 somewhat suboptimal CO<sub>2</sub>-fixation process, which is dependent on catalysis by the slow and  
39 promiscuous enzyme Rubisco. The enzyme binds the five carbon sugar Ribulose 1,5-bisphosphate  
40 (RuBP), adds a carbon dioxide molecule and hydrolyzes the six carbon intermediate to form two  
41 molecules of 3-phosphoglycerate (3PGA). In plants each active site only processes ~1-3 reactions per  
42 second, and frequently oxygen gas is incorporated instead of CO<sub>2</sub>, which leads to production of the  
43 toxic metabolite 2-phosphoglycolate.

44 To overcome these flux limitations, Rubisco is overexpressed to constitute up to 50% of the leaf  
45 soluble protein and is believed to be the most abundant protein on earth (2,3). Recognition that the  
46 enzyme catalyzes the rate limiting step have made its performance the heartpiece of multiple ongoing  
47 crop improvement strategies (4,5). In addition to its slow speed and inaccuracy, the enzyme is also  
48 susceptible to form dead-end inhibited complexes with several sugar phosphates that are present in its  
49 environment (6,7). CO<sub>2</sub> fixation ceases, unless the inhibitors are constantly removed. This action is  
50 performed by a group of dedicated molecular chaperones that have been termed the Rubisco activases  
51 (Rcas) (8-10). Three classes of Rca exist, and although all belong to the superfamily of AAA+  
52 proteins, their primary sequences and mechanisms are highly distinct, indicating convergent  
53 evolution(11,12). Red-type Rca found in red-lineage phytoplankton and proteobacteria transiently  
54 threads the C-terminus of the Rubisco large subunit through the axial pore of the AAA+ hexamer (13-  
55 15). In contrast the CbbQO-type Rca found in chemoautotrophic proteobacteria consists of a cup-  
56 shaped AAA+ hexamer (CbbQ<sub>6</sub>) bound to a single adaptor protein CbbO, which is essential for  
57 Rubisco activation (9). During Rca function the hexamer remodels CbbO, which is bound to inhibited  
58 Rubisco via a von Willebrand Factor A domain(16).

59 The detailed molecular mechanism by which inhibitory compounds are removed by higher plant Rca-  
60 mediated modelling of Rubisco's active site has long remained elusive (11,17). As functional Rca  
61 could be produced recombinantly, a large volume of biochemical information has accumulated on Rca

62 variants (18,19). In summary the data supports a canonical AAA+ pore-loop threading mechanism  
63 where the flat top surface of the hexameric disc engages Rubisco, followed by axial pore-loop  
64 threading of an element of Rubisco(20,21). The intrinsically disordered N-terminal domain, especially  
65 a conserved tryptophan, is also important in engaging the holoenzyme (21,22). Regarding Rubisco,  
66 early studies using green algal *Chlamydomonas* Rubisco were able to pinpoint two residues on the  
67 Rubisco large subunits'  $\beta$ C- $\beta$ D loop that contact the specificity helix (H9) of Rca (23,24). However, a  
68 historical inability to produce plant Rubisco in heterologous organisms such as *Escherichia coli*  
69 hampered further progress. This hurdle was recently removed (25), and here we took advantage of the  
70 newly established capability to produce and biochemically characterize many plant Rubisco variants  
71 for their interaction with Rca. We find that the highly conserved RbcL N-terminus is essential for Rca  
72 function, with a particular importance of two threonine residues T5 and T7. This is consistent with an  
73 N-terminal pore loop threading mechanism for higher plant Rca.

74

## 75 RESULTS

### 76 A surface scan of higher plant Rubisco for Rca-interacting residues

77 We used the recently established *E. coli* plant Rubisco expression platform (25,26) to produce a series  
78 of Arabidopsis Rubisco large subunits variants mutated in surface-localized residues in an effort to  
79 discover additional regions important for protein-protein interactions. We first tested the  $\beta$ C- $\beta$ D loop  
80 mutations E94K and P89A as positive controls (Fig. 1A), as these substitutions had earlier been shown  
81 to greatly perturb the ability of Spinach Rca to activate Chlamydomonas Rubisco (27). We then  
82 assayed the fully activated holoenzyme (ECM) and the inhibited apo enzyme bound to the substrate  
83 ribulose 1,5-bisphosphate (ER) in the presence and absence of the short (Rca $\beta$ ) isoform of  
84 Arabidopsis Rca (Fig. 1B). Consistent with the Chlamydomonas-spinach result, the inhibited E94K  
85 variant of Arabidopsis Rubisco remained non-functional in the presence of its cognate Rca,  
86 reconfirming the importance of the N-terminal  $\beta$ C- $\beta$ D loop in the interaction. The P89A variant,  
87 however, was activated well in this system (Fig. 1C), suggesting that the  $\beta$ C- $\beta$ D loop – Rca  
88 interaction is less sensitive to mutation when using Arabidopsis proteins.

89 We next targeted a range of surface-localized Rubisco large subunit residues for mutagenesis (Fig.  
90 2A, Fig. S2). As we have found earlier, multiple positively charged residues on the face of the Rca  
91 disc are important for its ability to activate Rubisco (21,28), and therefore the chosen mutations were  
92 biased towards probing negatively charged surface residues. This included those located in a  
93 negatively charged pocket at the dimer-dimer interface that has recently been implicated in the  
94 binding of carboxysomal Rubisco linker proteins in prokaryotic green-type Rubiscos (Fig. 2B)(29,30).  
95 We successfully purified 17 variants (Fig. S1), which were all able to carboxylate RuBP similarly to  
96 wild-type (Fig. 2C, Fig. S3). Rca assays indicated that the different variants could still be activated  
97 effectively indicating the chosen residues were not of critical importance to the Rubisco-Rca  
98 interaction (Fig. 2C, Fig. S3). Only K14A showed a statistically significant 52% increase in its Rca-  
99 mediated activation rate, possibly reflecting a reduced stability of the inhibited complex. Clearly the  
100 chosen single amino-acid substitutions were insufficient to disrupt the extensive protein-protein

101 interaction interface involved in Rubisco activation. However, attempts to produce combinations of  
102 mutations were unsuccessful either due to insolubility or non-functionality for all tested cases.

103

#### 104 **The RbcL N-terminus is essential for Rca function**

105 The red-type Rubisco activase CbbX transiently threads the RbcL C-terminus (13-15). However, the  
106 C-terminus of green-type Rubisco large subunits is poorly conserved and is of variable length (31),  
107 indicating a distinct mechanism for green-type Rca function. In contrast, while sequences at the N-  
108 terminus of red-type Rubisco large subunits differ between species, both length and sequence of the  
109 N-terminus of higher-plant RbcL is essentially completely conserved (Fig. 3A). In available crystal  
110 structures, residues 8-20 of the N-terminus are ordered only when the active site is in the closed  
111 (ligand-bound) form (Fig. 3B). In the closed conformation, the N-terminus is positioned directly  
112 above the 60's loop that co-ordinates P1 of the substrate, with F13, K14, G16 and K18 forming  
113 interactions with multiple residues of the 60's loop (32). Coupled with evidence that residues 9-15 of  
114 Rubisco from wheat are essential for functional carboxylation activity (33), the stringent conservation  
115 of the first 8 residues suggested thus a tantalizing target for mutational analysis.

116 A Rubisco variant with the first seven amino-acids replaced by methionine ( $\Delta N7$ ) displayed 83 % of  
117 wild-type carboxylation velocity (Fig. 3C). However, when the ER complex was formed, Rca was  
118 unable to reactivate  $\Delta N7$  (Fig. 3C). This result was consistent with the notion that a higher plant Rca  
119 hexamer engages the disordered N-terminus via its axial pore loops, followed by transient threading  
120 leading to active site disruption and inhibitor release.

#### 121 **A dissection of the RbcL N-terminal binding motif**

122 We then performed a detailed mutational analysis of the RbcL N-terminus, generating a series of  
123 variants that, in the ECM form were all able to carboxylate at least as well as wild-type (Fig. 4).  
124 Shortening the N-terminus by one or two amino acids ( $\Delta N1$ ,  $\Delta N2$ ) did not negatively affect Rca  
125 function. In contrast, replacing the first four amino acids with methionine ( $\Delta N3$ ) or deleting residues  
126 5-7 ( $\Delta TET$ ) almost completely eliminated the ability of Rca to activate Rubisco (Fig 3A).

127 Lengthening the N-terminus by inserting two alanine residues upstream of residue 2 (M1insAA)  
128 greatly reduced Rca function by ~64 %. Changing the register of the N-terminal sequence by inserting  
129 a AAA sequence upstream of K8 (T7insAAA) in the wild-type or  $\Delta$ TET variant (TET-AAA) also  
130 eliminated function. These results indicated that Rca function was highly sensitive to both length and  
131 identity of the N-terminus.

132 Next, we evaluated the effect of single amino acid substitutions in the N-terminal motif. Whereas E6A  
133 and K8A substitutions were well tolerated, both T5A and T7A resulted in ~70% reductions in Rca  
134 functionality. This findings indicates that the two threonine residues are likely to play an important  
135 role in the threading process, possibly via specific interactions with residues in Rca's pore-loop 1 and  
136 2 (20,21). We also further note that the observed 2 amino acid step interval would be consistent with  
137 successive zipper-like interactions that have been described to be utilized for substrate engagement at  
138 the central pore by multiple other AAA+ proteins (34-38).

139 Y20 forms a hydrogen bond to E60, a key catalytic residue that interacts with K334, which is  
140 positioned at the apex of Loop 6, and thought to orient the CO<sub>2</sub> molecule for gas addition (39). We  
141 hypothesized that this interaction could act to disrupt the active site, when the N-terminus is displaced  
142 by Rca-threading. The Y20F Rubisco mutant had a ~73% reduced carboxylation rate, but the  
143 activation rate by Rca was increased by 39% (Fig. 4B). This result suggests that the Y20-E60  
144 interaction is important for the integrity of the active site, and its loss facilitates disruption of the  
145 inhibited complex.

146 Quite unexpectedly, we found that multiple N-terminal variants and E94K presented with  
147 significantly enhanced carboxylation velocities (up to 53%) compared to the wild-type enzyme under  
148 the conditions used in our spectrophotometric Rubisco assay (Fig. 4A,B). This suggests that reducing  
149 the interactions of the N-terminus with the enzyme may result in faster Rubiscos. Interestingly, the  
150 fast cyanobacterial Form IB enzyme from *Synechococcus* PCC6301 (40) possesses a truncated N-  
151 terminus (equivalent to  $\Delta$ N6) (Fig. 3A). In a follow-up study, it will be important to use <sup>14</sup>C-CO<sub>2</sub>  
152 fixation assays to accurately quantify the carboxylation kinetics (41) and the CO<sub>2</sub>/O<sub>2</sub> specificity factor  
153 of the fast N-terminal variants.

## 155 DISCUSSION

156 The availability of *E. coli* produced recombinant higher plant Rubiscos permitted us to rapidly  
157 produce many variants and assay their capability to be engaged and activated by their cognate Rca  
158 chaperone. Mutational analysis of the holoenzyme surface indicated that Rca compatibility was not  
159 easily disrupted, with the tested variants remaining functional (Fig. 2). Arguably, inclusion of less  
160 conservative substitutions such as charge switches, could have been more informative here.

161 In contrast, mutagenesis of the highly conserved N-terminus resulted in multiple variants that were  
162 able to carboxylate RuBP, but could not be activated by Rca. The best described conserved  
163 mechanism of numerous AAA+ ATPases concerns the translocation of a substrate peptide through the  
164 central pore of the hexamer (42), and this is the modus operandi of the red-type Rca (13). Green-type  
165 Rca pore-loops have been shown to be critical for Rubisco activation (20,21). In addition we have  
166 long been aware of the RbcL  $\beta$ C- $\beta$ D loop – Rca specificity helix H9 interaction (27,43,44).

167 Assuming an axial pore loop- RbcL N-terminal threading mechanism we can now further constrain  
168 the positioning of an Rca hexameric model (20) in relation to an inhibited Rubisco structure (45).  
169 Helix 9 elements of two adjacent Rca subunits can be placed in proximity to two RbcL  $\beta$ C- $\beta$ D loops  
170 that are located on two adjacent dimers (Fig. 5). In this configuration the N-terminal tail (missing 6  
171 amino-acids in the structure used) is then accessible to the Rca pore. Transient threading would then  
172 result in pulling residues 13 to 20 away from the large subunit body. Disruptions of the associated van  
173 der Waal's and polar interactions (32), especially with the RbcL 60's loop, may be sufficient to  
174 trigger active site opening and inhibitor release.

175 An important question that remains completely unaddressed is the role of the critical Rca N-terminal  
176 domain. This disordered stretch of ~60 amino acids is not resolved in structural models, and a single  
177 amino acid substitution of W15A eliminates Rca function (21,22). It is likely involved in an  
178 additional, so far undescribed, anchoring site.

179



180 The model is consistent with an exquisite structural snapshot of a prokaryotic carboxysome-associated  
181 green-type Rca hexamer bound to cyanobacterial Rubisco that has been communicated in a concurrent  
182 Biorxiv pre-print (46). In agreement with our findings, the study also reports that an N-terminal 9-  
183 amino acid truncation of the tobacco Rubisco large subunit abolishes tobacco Rca function. Green-  
184 type Rubisco activation is thus an ancient, conserved process that appears to precede the primary  
185 endosymbiotic event (11).

186

## 187 **MATERIALS AND METHODS**

### 188 **Molecular biology**

189 Plasmids pBAD33k-*AtRbcLS*, p11a-*AtC60αβ/C20* and pCDFduet-*AtR1/R2/Rx/B2* enabling  
190 the production of Arabidopsis Rubisco in *E. coli* were a gift from Dr. Manajit Hayer-Hartl (25). To  
191 achieve our final construct containing the large and small subunits of Rubisco, a 6x Histidine tag was  
192 appended to the C-terminus of *rbcS* via the Quikchange protocol (Stratagene). Restriction free cloning  
193 of the RBS-*AtRbcLS*His cassette was utilized to insert the cassette into the multiple cloning site 1 of  
194 the pRSFDuet™-1 plasmid (Novagen). To obtain single mutants, the Quikchange protocol was  
195 applied to pRSFduet-*AtRbcLS*His. Truncations of the N-terminus were performed by PCR  
196 amplification of regions flanking the unwanted sequence. Linearized products were then  
197 phosphorylated by T4 PNK (NEB) before end to end ligation. All primers used are listed in Table S1  
198 and protein-encoding sequences were verified by DNA sequencing.

199 To obtain a vector encoding *Arabidopsis thaliana* Rca (*AtRcaβ*), the sequence corresponding  
200 to amino acid residues 59 to 474 (Uniprot P10896) were amplified from a cDNA library of  
201 Arabidopsis with BamHI and NotI restriction sites at the 5' and 3' end respectively. The sequence was  
202 then inserted into the multiple cloning site of the pHue expression vector using the appropriate  
203 restriction sites to yield the final construct pHueAthRcaβ.

### 204 **Protein Purification**

205 Recombinant wild-type activase from Arabidopsis were expressed and purified following our  
206 protocol for the purification of *Agave tequilana* activases to yield activases with a single glycine prior  
207 to the native N-terminus of the enzyme (28). For expression and purification of recombinant  
208 Rubiscos, *E. coli* BL21 cells containing p11a-*AtC60αβ/C20*, pCDFduet-*AtR1/R2/Rx/B2*, and  
209 pRSFduet-*AtRbcLS*His were grown in LB medium supplemented with ampicillin (200 μg mL<sup>-1</sup>),  
210 kanamycin (30 μg mL<sup>-1</sup>), and streptomycin (50 μg mL<sup>-1</sup>). Starter cultures of 2 mL were grown  
211 overnight at 37°C prior to inoculation of 1 L cultures. Large scale cultures were grown for 3 hours at  
212 37°C to reach an OD600 of 0.3 - 0.4 before temperatures were lowered to 23°C and harvested after 16

213 hours. Cells were lysed in Histrap-buffer A (50 mM Tris-HCl pH 8.0, 50 mM NaCl, 10 mM  
214 Imidazole). Soluble fractions were then applied to HisTrap HP 5 mL columns (Sigma Aldrich)  
215 equilibrated with Histrap-buffer A. Proteins were eluted with a linear imidazole gradient from 10 mM  
216 to 200 mM. Following elution, Rubisco containing fractions were immediately subjected to a  
217 Superdex 200 gel filtration column (GE Healthcare) equilibrated with buffer A (20 mM Tris-HCl pH  
218 8.0, 50 mM NaCl) supplemented with 5% (v/v) glycerol. Pure Rubisco fractions were then pooled,  
219 concentrated, and flash-frozen for storage at -80°C. Pure proteins were quantified by measuring their  
220 absorbance at 280 nm, using extinction coefficients calculated using the ProtParam tool  
221 (<https://web.expasy.org/protparam/>).

## 222 **Biochemical assays**

223 Rubisco and Rubisco reactivation activities were measured and quantified as described (14),  
224 using the spectrophotometric Rubisco assay (47). RuBP was synthesized enzymatically from ribose 5-  
225 phosphate (48) and purified by anion exchange chromatography(49). ECM was formed by incubating  
226 20  $\mu$ M Rubisco active sites in Buffer A supplemented with 20 mM NaHCO<sub>3</sub> and 10 mM MgCl<sub>2</sub> (50  
227 mins, 25 °C). For ER, complexes were generated by incubating 20  $\mu$ M Rubisco active sites in Buffer  
228 A containing 4 mM EDTA (10 mins) prior to addition of RuBP to a final concentration of 1 mM (50  
229 mins, 25 °C). Rca activities were calculated using the ECM and ER carboxylase time-courses  
230 collected on the same day. All assays were performed in assay buffer (100 mM Tricine pH 8.0, 5 mM  
231 MgCl<sub>2</sub>) containing 3  $\mu$ l coupling enzymes mixture (Creatine P-kinase (2.5 U/ml), Glyceraldehyde-3-P  
232 dehydrogenase (2.5 units/ml), 3-phosphoglycerate kinase and Triose-P isomerase/Glycerol-3-P  
233 dehydrogenase (20/2 units/ml)), 20 mM NaHCO<sub>3</sub>, 0.5 mM NADH, 2 mM ATP, 10 mM Creatine-P, 1  
234 mM RuBP. A final concentration of 0.5  $\mu$ M Rubisco active sites and 2  $\mu$ M Rca protomer were  
235 utilized where appropriate.

236

237 **ACKNOWLEDGEMENTS**

238 We thank Dr. Manajit Hayer-Hartl for the gift of plasmids pBAD33k-*AtRbcLS*, p11a-  
239 *AtC60αβ/C20* and pCDFduet-*AtR1/R2/Rx/B2*. Lynette Liew synthesized RuBP. pHue*AtRcaβ*  
240 was cloned by Devendra Shivhare. This work was funded by the Ministry of Education  
241 (MOE) of Singapore Tier 2 grant to O.M.-C (MOE2016-T2-2-088).

## 242 **FIGURE LEGENDS**

243 **Figure 1. Production and Rca assay of plant Rubisco variants** (A) SDS-PAGE analysis of purified  
244 recombinant wild-type Arabidopsis Rubisco and  $\beta$ C- $\beta$ D mutant variants (B) Rca functions to remodel  
245 inhibited E.R. complexes, releasing RuBP. The apo-enzyme E can then bind non-substrate CO<sub>2</sub> and  
246 Mg<sup>2+</sup> to form the functional E.C.M. holoenzyme. (C) Rubisco activation assays of wild type and  $\beta$ C-  
247  $\beta$ D loop mutant Rubisco variants. Assays were performed at 25°C and contained 0.5  $\mu$ M Rubisco  
248 active sites in the presence and absence of Arabidopsis Rca (2  $\mu$ M protomer). Error bars indicate the  
249 S.D. of at least three independent experiments.

250 **Figure 2. Mutational scan of the Rubisco surface** (A) Mutated surface residues are visualized on the  
251 surface of inhibited Arabidopsis Rubisco (PDB: 5IUO) and coloured in groups. (B) Electrostatic  
252 surface potential as analysed by the Adaptive Poisson-Boltzmann Solver (APBS) wrapper function in  
253 PyMOL. The location of a negatively charged patch between two large subunit dimers is circled in  
254 yellow. (C) Rca function and carboxylation rates of surface mutants in groups corresponding to (A).  
255 Assays were conducted at 25°C using 0.5  $\mu$ M Rubisco active sites (ER or ECM) and 2  $\mu$ M wild type  
256 activase protomers when appropriate. Error bars indicate the S.D. of at least three independent  
257 experiments. The corresponding time course data is shown in Fig. S2. A significant difference from  
258 the wild-type value is indicated by an asterisk (One-way ANOVA, posthoc Tukey test,  $p < 0.05$ ).

259 **Figure 3. The N-terminus of the Rubisco large subunit is essential for Rca function** (A) Sequence  
260 alignment of RbcL N-terminal sequences. In higher plants the N-termini are almost completely  
261 conserved, as indicated by a web-logo representation of the consensus sequence (~500 plant RbcL  
262 sequences). (B) Visualization of the ordered N-terminal segment (yellow- starting from residue 7)  
263 using a model of the inhibited *Chlamydomonas reinhardtii* Rubisco (PDB:1GK8). (C) Rubisco  
264 activase assays of wild-type and  $\Delta$ N7 mutant Arabidopsis Rubiscos. Assays were conducted at 25°C  
265 with 2  $\mu$ M wild type activase protomers and 0.5  $\mu$ M Rubisco active sites. Error bars indicate the S.D.  
266 of at least three independent experiments.

267 **Figure 4. Mutational analysis of the RbcL N-terminus.**

268 Activase activity and carboxylation rates of Rubisco N-terminal truncations and insertions (*A*) and  
269 point mutant (*B*) variants were assayed. Time courses are shown in Fig. S4. Values significantly  
270 different from their wild-type equivalent are indicated by an asterisk (One-way ANOVA, posthoc  
271 Tukey test,  $p < 0.05$ ).

272 **Figure 5. Model for the Rubisco-Rca interaction.** By placing the Helix9 interaction site (in red) of  
273 two adjacent Rca subunits in proximity to the  $\beta$ C- $\beta$ D loops (yellow) of two large subunits belonging  
274 to different dimers, the RbcL N-terminus (in magenta- N-terminal 6 amino acids missing) can be  
275 positioned under the axial pore of the Rca hexamer. Transient pore-loop threading would then lead to  
276 disruptions of interactions between the N-terminus and the catalytic 60s loop, followed by inhibitor  
277 release. PDB:1GK8 (Rubisco) and 3ZW6 (Rca). The figure was drawn using ChimeraX (50).

278

279

280

281

282

283

284

285

## 286 REFERENCES

- 287 1. Spreitzer, R. J., and Salvucci, M. E. (2002) Rubisco: structure, regulatory interactions, and  
288 possibilities for a better enzyme. *Annual review of plant biology* **53**, 449-475
- 289 2. Raven, J. A. (2013) Rubisco: still the most abundant protein of Earth? (vol 198, pg 1, 2013).  
290 *New Phytologist* **198**, 970-970
- 291 3. Bar-On, Y. M., and Milo, R. (2019) The global mass and average rate of rubisco. *Proc Natl*  
292 *Acad Sci U S A* **116**, 4738-4743
- 293 4. Long, S. P., Marshall-Colon, A., and Zhu, X. G. (2015) Meeting the global food demand of the  
294 future by engineering crop photosynthesis and yield potential. *Cell* **161**, 56-66
- 295 5. Zhu, X. G., Long, S. P., and Ort, D. R. (2010) Improving photosynthetic efficiency for greater  
296 yield. *Annual review of plant biology* **61**, 235-261
- 297 6. Parry, M. A., Keys, A. J., Madgwick, P. J., Carmo-Silva, A. E., and Andralojc, P. J. (2008)  
298 Rubisco regulation: a role for inhibitors. *Journal of experimental botany* **59**, 1569-1580
- 299 7. Pearce, F. G., and Andrews, T. J. (2003) The relationship between side reactions and slow  
300 inhibition of ribulose-bisphosphate carboxylase revealed by a loop 6 mutant of the tobacco  
301 enzyme. *Journal of Biological Chemistry* **278**, 32526-32536
- 302 8. Salvucci, M. E., Portis, A. R., Jr., and Ogren, W. L. (1985) A soluble chloroplast protein  
303 catalyzes ribulosebiphosphate carboxylase/oxygenase activation in vivo. *Photosynthesis*  
304 *research* **7**, 193-201
- 305 9. Tsai, Y. C., Lapina, M. C., Bhushan, S., and Mueller-Cajar, O. (2015) Identification and  
306 characterization of multiple rubisco activases in chemoautotrophic bacteria. *Nature*  
307 *communications* **6**, 8883
- 308 10. Mueller-Cajar, O., Stotz, M., Wendler, P., Hartl, F. U., Bracher, A., and Hayer-Hartl, M. (2011)  
309 Structure and function of the AAA+ protein CbbX, a red-type Rubisco activase. *Nature* **479**,  
310 194-199
- 311 11. Mueller-Cajar, O. (2017) The Diverse AAA+ Machines that Repair Inhibited Rubisco Active  
312 Sites. *Frontiers in Molecular Biosciences* **4**
- 313 12. Hayer-Hartl, M., and Hartl, F. U. (2020) Chaperone Machineries of Rubisco - The Most  
314 Abundant Enzyme. *Trends Biochem Sci*
- 315 13. Bhat, J. Y., Milicic, G., Thieulin-Pardo, G., Bracher, A., Maxwell, A., Ciniawsky, S., Mueller-  
316 Cajar, O., Engen, J. R., Hartl, F. U., Wendler, P., and Hayer-Hartl, M. (2017) Mechanism of  
317 Enzyme Repair by the AAA+ Chaperone Rubisco Activase. *Molecular Cell* **67**, 744-756 e746
- 318 14. Loganathan, N., Tsai, Y.-C. C., and Mueller-Cajar, O. (2016) Characterization of the  
319 heterooligomeric red-type rubisco activase from red algae. *Proceedings of the National*  
320 *Academy of Sciences* **113**, 14019-14024
- 321 15. Mueller-Cajar, O., Stotz, M., Wendler, P., Hartl, F. U., Bracher, A., and Hayer-Hartl, M. (2011)  
322 Structure and function of the AAA+ protein CbbX, a red-type Rubisco activase. *Nature* **479**,  
323 194-199
- 324 16. Tsai, Y. C., Ye, F., Liew, L., Liu, D., Bhushan, S., Gao, Y. G., and Mueller-Cajar, O. (2020)  
325 Insights into the mechanism and regulation of the CbbQO-type Rubisco activase, a MoxR  
326 AAA+ ATPase. *Proc Natl Acad Sci U S A* **117**, 381-387
- 327 17. Bracher, A., Whitney, S. M., Hartl, F. U., and Hayer-Hartl, M. (2017) Biogenesis and Metabolic  
328 Maintenance of Rubisco. *Annu Rev Plant Biol* **68**, 29-60
- 329 18. Portis, A. R. (2003) Rubisco activase - Rubisco's catalytic chaperone. *Photosynthesis Research*  
330 **75**, 11-27
- 331 19. Carmo-Silva, E., Scales, J. C., Madgwick, P. J., and Parry, M. A. (2015) Optimizing Rubisco and  
332 its regulation for greater resource use efficiency. *Plant, cell & environment* **38**, 1817-1832

- 333 20. Stotz, M., Mueller-Cajar, O., Ciniawsky, S., Wendler, P., Hartl, F. U., Bracher, A., and Hayer-  
334 Hartl, M. (2011) Structure of green-type Rubisco activase from tobacco. *Nature Structural &*  
335 *Molecular Biology* **18**, 1366-U1378
- 336 21. Shivhare, D., Ng, J., Tsai, Y. C., and Mueller-Cajar, O. (2019) Probing the rice Rubisco-Rubisco  
337 activase interaction via subunit heterooligomerization. *Proc Natl Acad Sci U S A* **116**, 24041-  
338 24048
- 339 22. van de Loo, F. J., and Salvucci, M. E. (1996) Activation of ribulose-1,5-bisphosphate  
340 carboxylase/oxygenase (Rubisco) involves Rubisco activase Trp16. *Biochemistry* **35**, 8143-  
341 8148
- 342 23. Wang, Z. Y., Snyder, G. W., Esau, B. D., Portis, A. R., and Ogren, W. L. (1992) Species-  
343 Dependent Variation in the Interaction of Substrate-Bound Ribulose-1,5-Bisphosphate  
344 Carboxylase Oxygenase (Rubisco) and Rubisco Activase. *Plant physiology* **100**, 1858-1862
- 345 24. Larson, E. M., O'Brien, C. M., Zhu, G., Spreitzer, R. J., and Portis, A. R. (1997) Specificity for  
346 Activase Is Changed by a Pro-89 to Arg Substitution in the Large Subunit of Ribulose-1,5-  
347 bisphosphate Carboxylase/Oxygenase. *Journal of Biological Chemistry* **272**, 17033-17037
- 348 25. Aigner, H., Wilson, R. H., Bracher, A., Calisse, L., Bhat, J. Y., Hartl, F. U., and Hayer-Hartl, M.  
349 (2017) Plant RuBisCo assembly in E. coli with five chloroplast chaperones including BSD2.  
350 *Science* **358**, 1272-1278
- 351 26. Wilson, R. H., Thiulin-Pardo, G., Hartl, F. U., and Hayer-Hartl, M. (2019) Improved  
352 recombinant expression and purification of functional plant Rubisco. *FEBS Lett* **593**, 611-621
- 353 27. Ott, C. M., Smith, B. D., Portis, A. R., Jr., and Spreitzer, R. J. (2000) Activase Region on  
354 Chloroplast Ribulose-1,5-bisphosphate Carboxylase/Oxygenase. NONCONSERVATIVE  
355 SUBSTITUTION IN THE LARGE SUBUNIT ALTERS SPECIES SPECIFICITY OF PROTEIN  
356 INTERACTION
- 357 10.1074/jbc.M004580200. *J. Biol. Chem.* **275**, 26241-26244
- 358 28. Shivhare, D., and Mueller-Cajar, O. (2017) Characterization of thermostable CAM Rubisco  
359 activase reveals a Rubisco interacting surface loop. *Plant Physiology*
- 360 29. Wang, H., Yan, X., Aigner, H., Bracher, A., Nguyen, N. D., Hee, W. Y., Long, B. M., Price, G. D.,  
361 Hartl, F. U., and Hayer-Hartl, M. (2019) Rubisco condensate formation by CcmM in beta-  
362 carboxysome biogenesis. *Nature* **566**, 131-135
- 363 30. Oltrogge, L. M., Chaijarasphong, T., Chen, A. W., Bolin, E. R., Marqusee, S., and Savage, D. F.  
364 (2020) Multivalent interactions between CsoS2 and Rubisco mediate alpha-carboxysome  
365 formation. *Nat Struct Mol Biol* **27**, 281-287
- 366 31. Satagopan, S., and Spreitzer, R. J. (2004) Substitutions at the Asp-473 Latch Residue of  
367 Chlamydomonas Ribulosebiphosphate Carboxylase/Oxygenase Cause Decreases in  
368 Carboxylation Efficiency and CO<sub>2</sub>/O<sub>2</sub> Specificity
- 369 10.1074/jbc.M313215200. *J. Biol. Chem.* **279**, 14240-14244
- 370 32. Schreuder, H. A., Knight, S., Curmi, P. M. G., Andersson, I., Cascio, D., Branden, C. I., and  
371 Eisenberg, D. (1993) Formation of the Active-Site of Ribulose-1,5-Bisphosphate Carboxylase  
372 Oxygenase by a Disorder Order Transition from the Unactivated to the Activated Form.  
373 *Proceedings of the National Academy of Sciences of the United States of America* **90**, 9968-  
374 9972
- 375 33. Gutteridge, S., Millard, B. N., and Parry, M. A. J. (1986) Inactivation of ribulose-bisphosphate  
376 carboxylase by limited proteolysis. *FEBS Letters* **196**, 263-268
- 377 34. Puchades, C., Rampello, A. J., Shin, M., Giuliano, C. J., Wiseman, R. L., Glynn, S. E., and  
378 Lander, G. C. (2017) Structure of the mitochondrial inner membrane AAA+ protease YME1  
379 gives insight into substrate processing. *Science* **358**
- 380 35. Shin, M., Puchades, C., Asmita, A., Puri, N., Adjei, E., Wiseman, R. L., Karzai, A. W., and  
381 Lander, G. C. (2020) Structural basis for distinct operational modes and protease activation  
382 in AAA+ protease Lon. *Science Advances* **6**, eaba8404



- 383 36. Gates, S. N., Yokom, A. L., Lin, J., Jackrel, M. E., Rizo, A. N., Kendsersky, N. M., Buell, C. E.,  
384 Sweeny, E. A., Mack, K. L., Chuang, E., Torrente, M. P., Su, M., Shorter, J., and Southworth, D.  
385 R. (2017) Ratchet-like polypeptide translocation mechanism of the AAA+ disaggregase  
386 Hsp104. *Science* **357**, 273-279
- 387 37. Han, H., Monroe, N., Sundquist, W. I., Shen, P. S., and Hill, C. P. (2017) The AAA ATPase Vps4  
388 binds ESCRT-III substrates through a repeating array of dipeptide-binding pockets. *Elife* **6**
- 389 38. Yu, H., Lupoli, T. J., Kovach, A., Meng, X., Zhao, G., Nathan, C. F., and Li, H. (2018) ATP  
390 hydrolysis-coupled peptide translocation mechanism of Mycobacterium tuberculosis ClpB.  
391 *Proc Natl Acad Sci U S A* **115**, E9560-E9569
- 392 39. Parry, M. A. J., Andralojc, P. J., Mitchell, R. A. C., Madgwick, P. J., and Keys, A. J. (2003)  
393 Manipulation of Rubisco: the amount, activity, function and regulation. *Journal of*  
394 *Experimental Botany* **54**, 1321-1333
- 395 40. Mueller-Cajar, O., and Whitney, S. M. (2008) Evolving improved Synechococcus Rubisco  
396 functional expression in Escherichia coli. *Biochem J* **414**, 205-214
- 397 41. Wilson, R. H., Martin-Avila, E., Conlan, C., and Whitney, S. M. (2018) An improved  
398 Escherichia coli screen for Rubisco identifies a protein-protein interface that can enhance  
399 CO<sub>2</sub>-fixation kinetics. *J Biol Chem* **293**, 18-27
- 400 42. Puchades, C., Sandate, C. R., and Lander, G. C. (2020) The molecular principles governing the  
401 activity and functional diversity of AAA+ proteins. *Nat Rev Mol Cell Biol* **21**, 43-58
- 402 43. Portis, A. R., Li, C. S., Wang, D. F., and Salvucci, M. E. (2008) Regulation of Rubisco activase  
403 and its interaction with Rubisco. *Journal of Experimental Botany* **59**, 1597-1604
- 404 44. Larson, E. M., O'Brien, C. M., Zhu, G., Spreitzer, R. J., and Portis Jr., A. R. (1997) Specificity for  
405 Activase Is Changed by a Pro-89 to Arg Substitution in the Large Subunit of Ribulose-1,5-  
406 bisphosphate Carboxylase/Oxygenase
- 407 10.1074/jbc.272.27.17033. *J. Biol. Chem.* **272**, 17033-17037
- 408 45. Taylor, T. C., Backlund, A., Bjorhall, K., Spreitzer, R. J., and Andersson, I. (2001) First crystal  
409 structure of rubisco from a green alga, Chlamydomonas reinhardtii. *Journal of Biological*  
410 *Chemistry* **276**, 48159-48164
- 411 46. Flecken, M., Wang, H., Popilka, L., Hartl, F. U., Bracher, A., and Hayer-Hartl, M. (2020) Dual  
412 Role of a Rubisco Activase in Metabolic Repair and Carboxysome Organization. *bioRxiv*,  
413 2020.2005.2016.099382
- 414 47. Kubien, D. S., Brown, C. M., and Kane, H. J. (2011) Quantifying the amount and activity of  
415 Rubisco in leaves. *Methods in molecular biology* **684**, 349-362
- 416 48. Horecker, B. L., Hurwitz, J., and Weissbach, A. (1958) Ribulose diphosphate. *Biochemical*  
417 *Preparations* **6**, 83-90
- 418 49. Kane, H. J., Wilkin, J. M., Portis, A. R., and Andrews, T. J. (1998) Potent inhibition of ribulose-  
419 bisphosphate carboxylase by an oxidized impurity in ribulose-1,5-bisphosphate. *Plant*  
420 *Physiology* **117**, 1059-1069
- 421 50. Goddard, T. D., Huang, C. C., Meng, E. C., Pettersen, E. F., Couch, G. S., Morris, J. H., and  
422 Ferrin, T. E. (2018) UCSF ChimeraX: Meeting modern challenges in visualization and analysis.  
423 *Protein Sci* **27**, 14-25

424

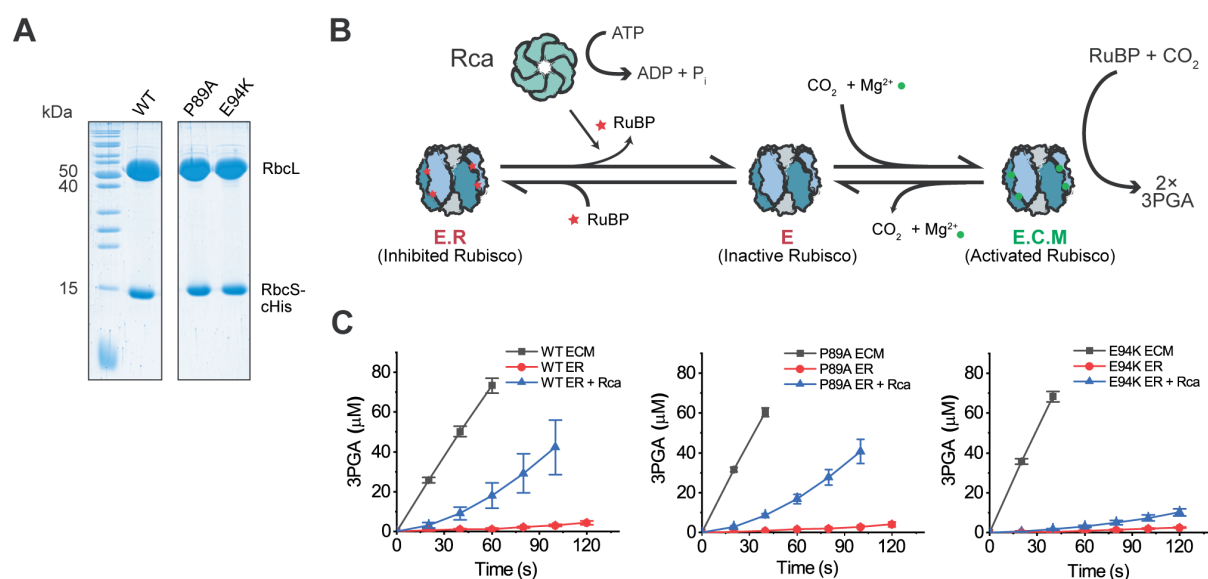

**Figure 1. Production and Rca assay of plant Rubisco variants** (A) SDS-PAGE analysis of purified recombinant wild-type Arabidopsis Rubisco and  $\beta$ C- $\beta$ D mutant variants (B) Rca functions to remodel inhibited E.R. complexes, releasing RuBP. The apo-enzyme E can then bind non-substrate  $\text{CO}_2$  and  $\text{Mg}^{2+}$  to form the functional E.C.M. holoenzyme. (C) Rubisco activation assays of wild type and  $\beta$ C- $\beta$ D loop mutant Rubisco variants. Assays were performed at 25°C and contained 0.5  $\mu\text{M}$  Rubisco active sites in the presence and absence of Arabidopsis Rca (2  $\mu\text{M}$  protomer). Error bars indicate the S.D. of at least three independent experiments.

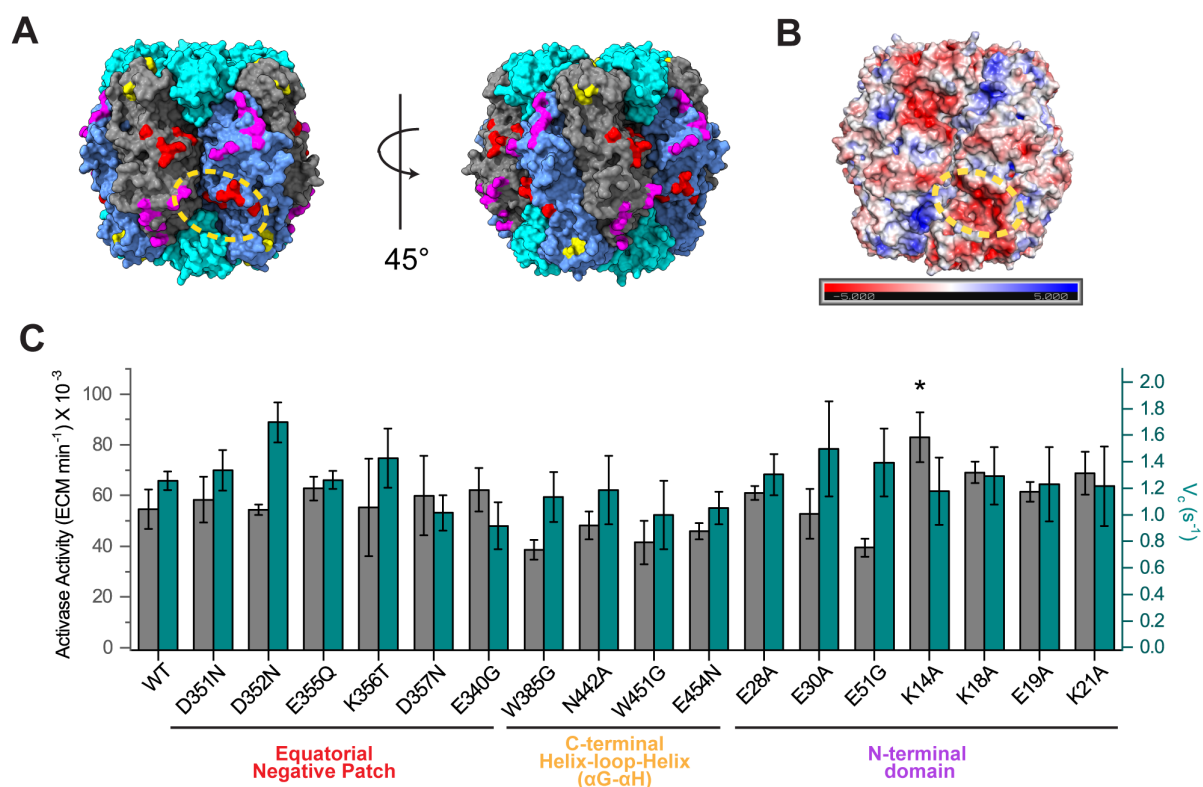

**Figure 2. Mutational scan of the Rubisco surface** (A) Mutated surface residues are visualized on the surface of inhibited *Arabidopsis rubisco* (PDB: 5IUO) and coloured in groups. (B) Electrostatic surface potential as analysed by the Adaptive Poisson-Boltzmann Solver (APBS) wrapper function in PyMOL. The location of a negatively charged patch between two large subunit dimers is circled in yellow. (C) Rca function and carboxylation rates of surface mutants in groups corresponding to (A). Assays were conducted at 25°C using 0.5  $\mu$ M Rubisco active sites (ER or ECM) and 2  $\mu$ M wild type activase protomers when appropriate. Error bars indicate the S.D. of at least three independent experiments. The corresponding time course data is shown in Fig. S2. A significant difference from the wild-type value is indicated by an asterisk (One-way ANOVA, posthoc Tukey test,  $p < 0.05$ ).

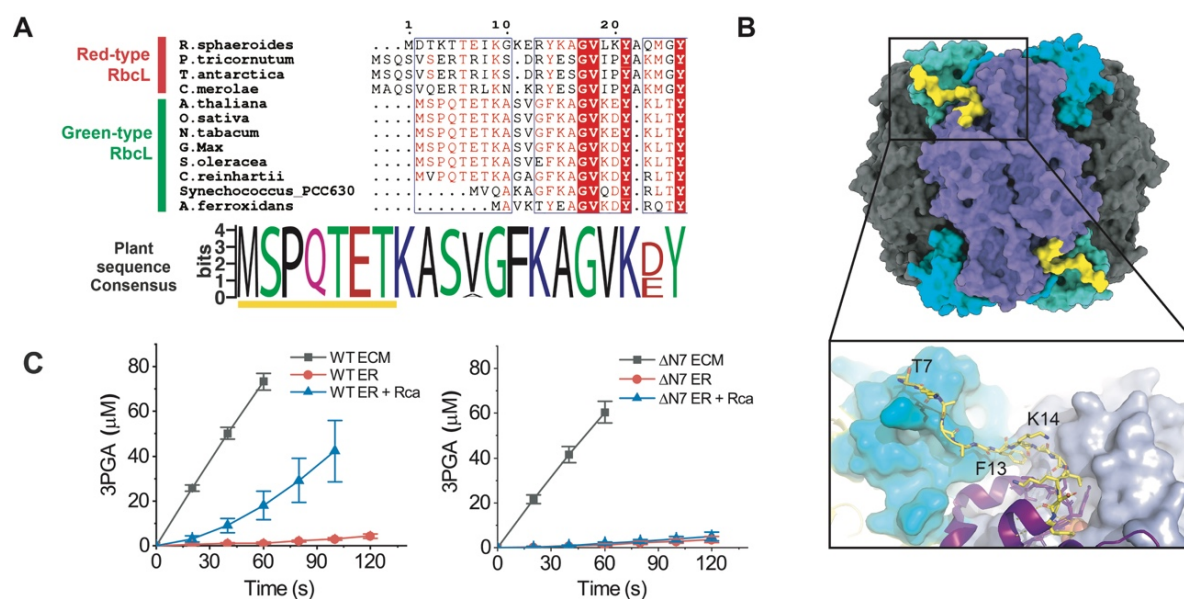

**Figure 3. The N-terminus of the Rubisco large subunit is essential for Rca function (A)**

Sequence alignment of RbcL N-terminal sequences. In higher plants the N-termini are almost completely conserved, as indicated by a web-logo representation of the consensus sequence (~500 plant RbcL sequences). (B) Visualization of the ordered N-terminal segment (yellow-starting from residue 7) using a model of the inhibited *Chlamydomonas reinhardtii* Rubisco (PDB:1GK8). (C) Rubisco activase assays of wild-type and  $\Delta N7$  mutant Arabidopsis Rubiscos. Assays were conducted at 25°C with 2  $\mu$ M wild type activase protomers and 0.5  $\mu$ M Rubisco active sites. Error bars indicate the S.D. of at least three independent experiments.

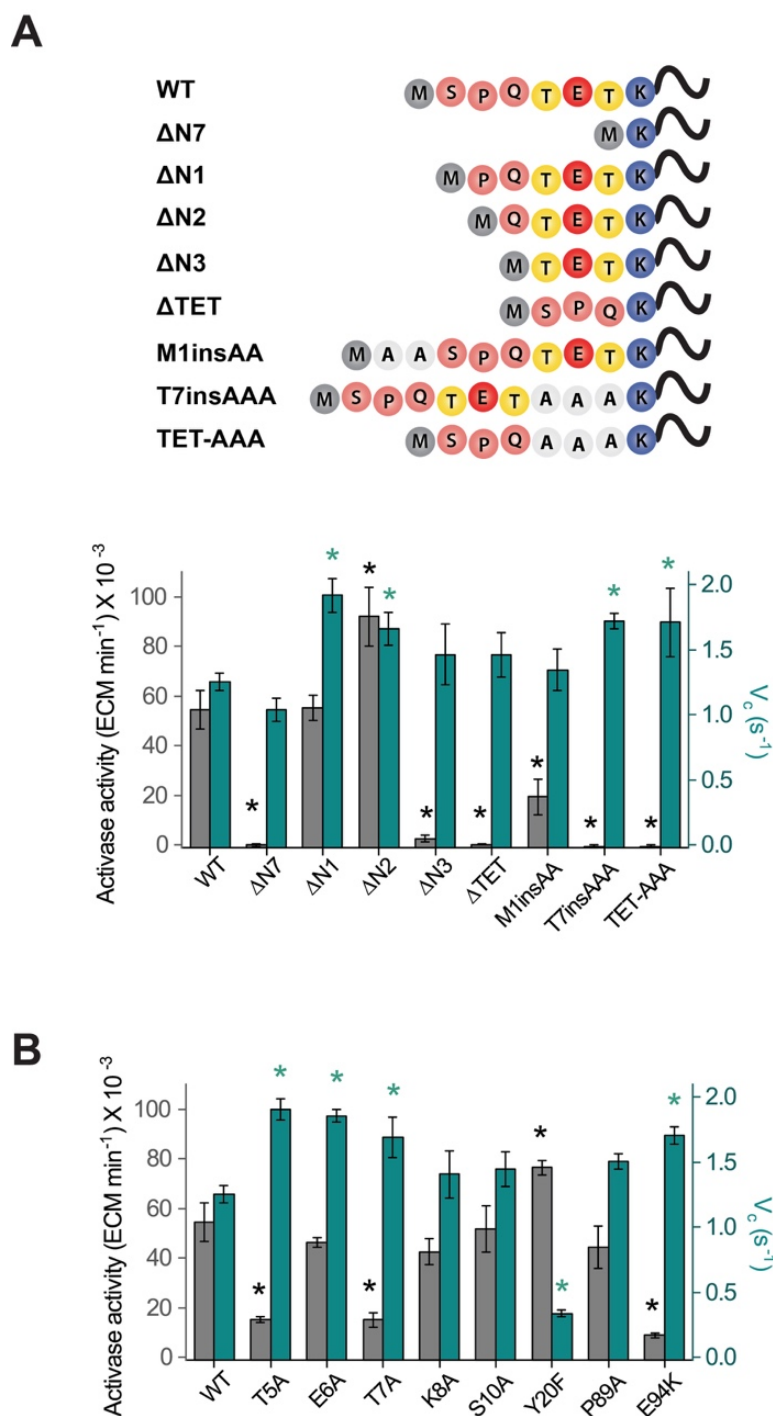

**Figure 4. Mutational analysis of the RbcL N-terminus.**

Activase activity and carboxylation rates of Rubisco N-terminal truncations and insertions (A) and point mutant (B) variants were assayed. Time courses are shown in Fig. S4. Values significantly different from their wild-type equivalent are indicated by an asterisk (One-way ANOVA, posthoc Tukey test,  $p < 0.05$ ).

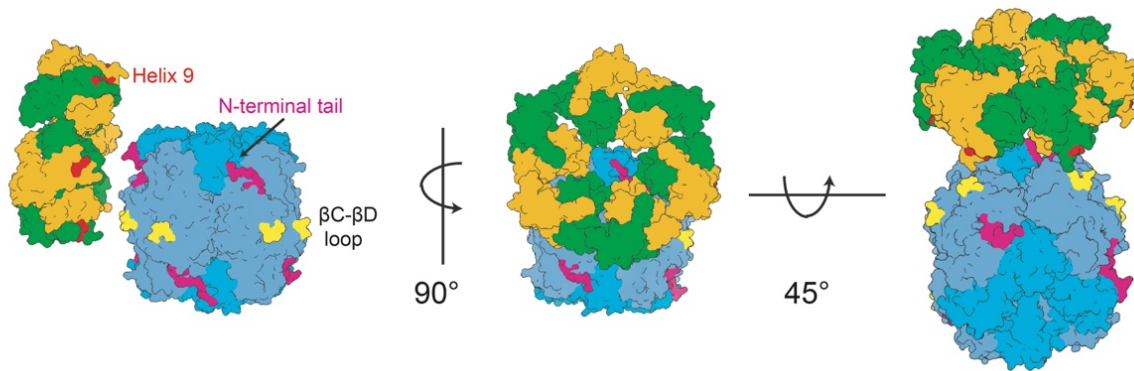

**Figure 5. Model for the Rubisco-Rca interaction.** By placing the Helix 9 interaction site (in red) of two adjacent Rca subunits in proximity to the  $\beta$ C- $\beta$ D loops (yellow) of two large subunits belonging to different dimers, the RbcL N-terminus (in magenta- N-terminal 6 amino acids missing) can be positioned under the axial pore of the Rca hexamer. Transient pore-loop threading would then lead to disruptions of interactions between the N-terminus and the catalytic 60s loop, followed by inhibitor release. PDB:1GK8 (Rubisco) and 3ZW6 (Rca).

**Supporting Information (SI)**

**Rubisco activase remodels plant Rubisco via the large subunit N-terminus**

Jediael Ng and Oliver Mueller-Cajar\*

School of Biological Sciences, Nanyang Technological University, 60 Nanyang Drive,

Singapore 637551. Singapore

\*Correspondence: [cajar@ntu.edu.sg](mailto:cajar@ntu.edu.sg)



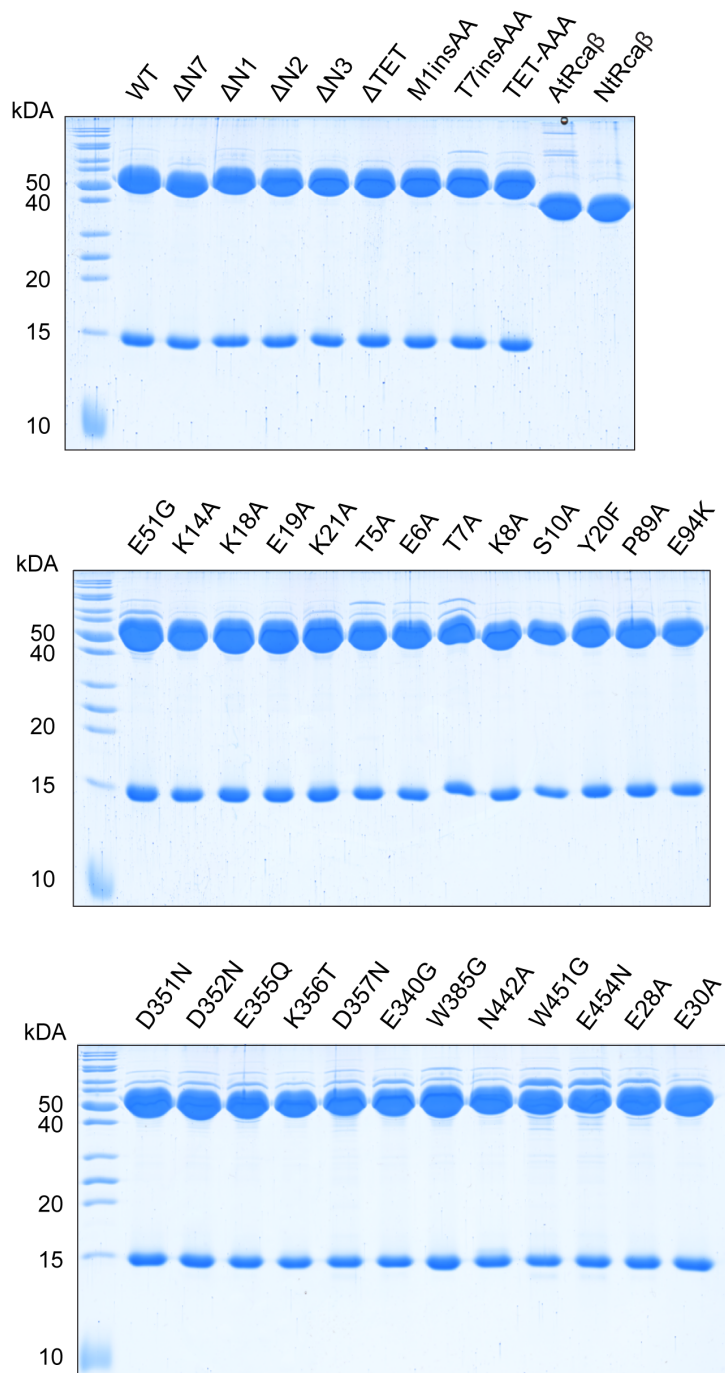

**Fig. S1. SDS-PAGE analysis of proteins used in this study.** 4  $\mu$ g of purified protein was loaded per lane.



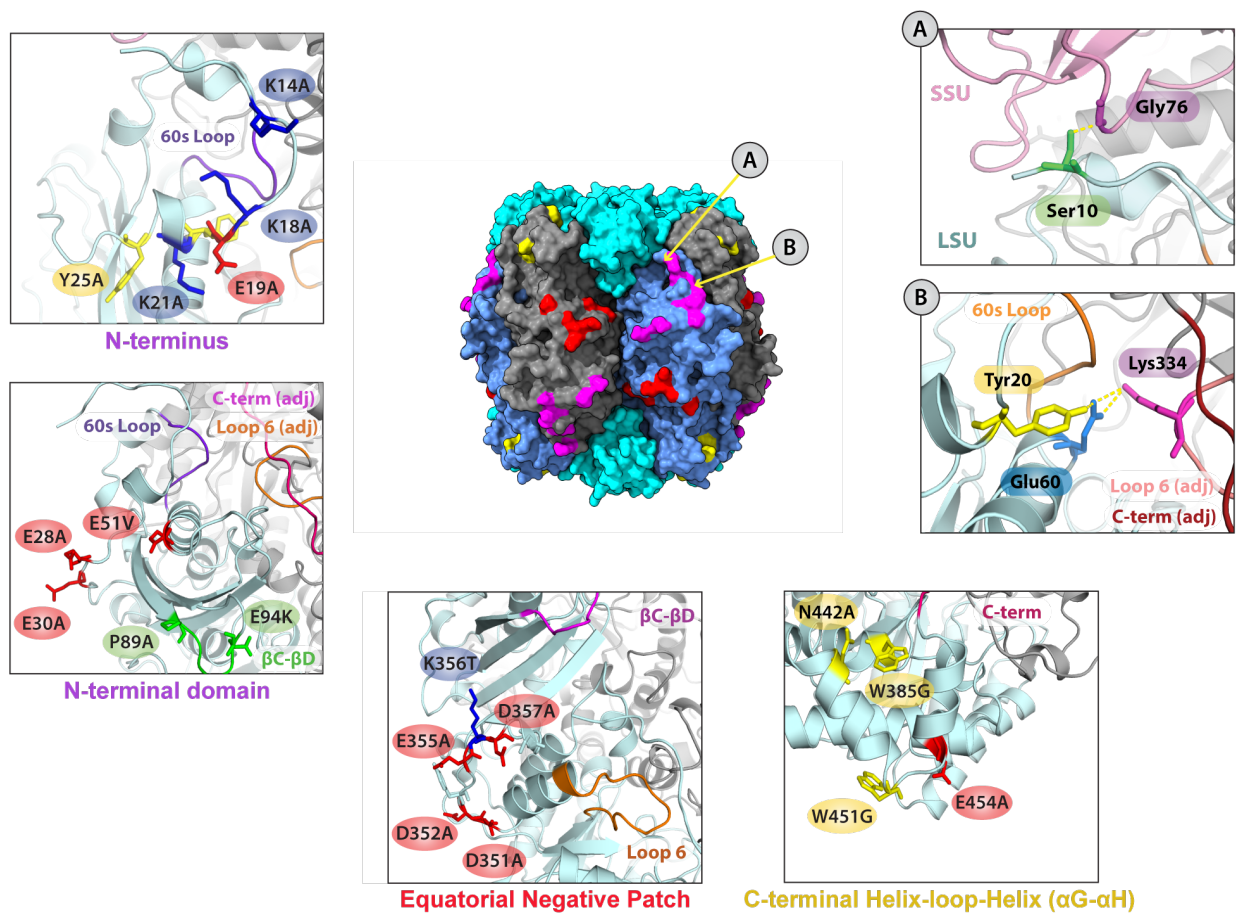

**Fig. S2. Structural representations of mutated residues on the surface of Rubisco.** Detailed views of surface residues substituted in the mutational analysis. Panels on the right depict the interaction network for S10 and Y20. Serine 10 hydrogen bonds to Glycine 67 of the small subunit while the hydroxyl group on the side chain of Tyrosine 20 hydrogen bonds to Glutamate 60. Mutants of these residues were generated to investigate whether these interactions were essential for the mechanism of the activase (Fig. 4B).

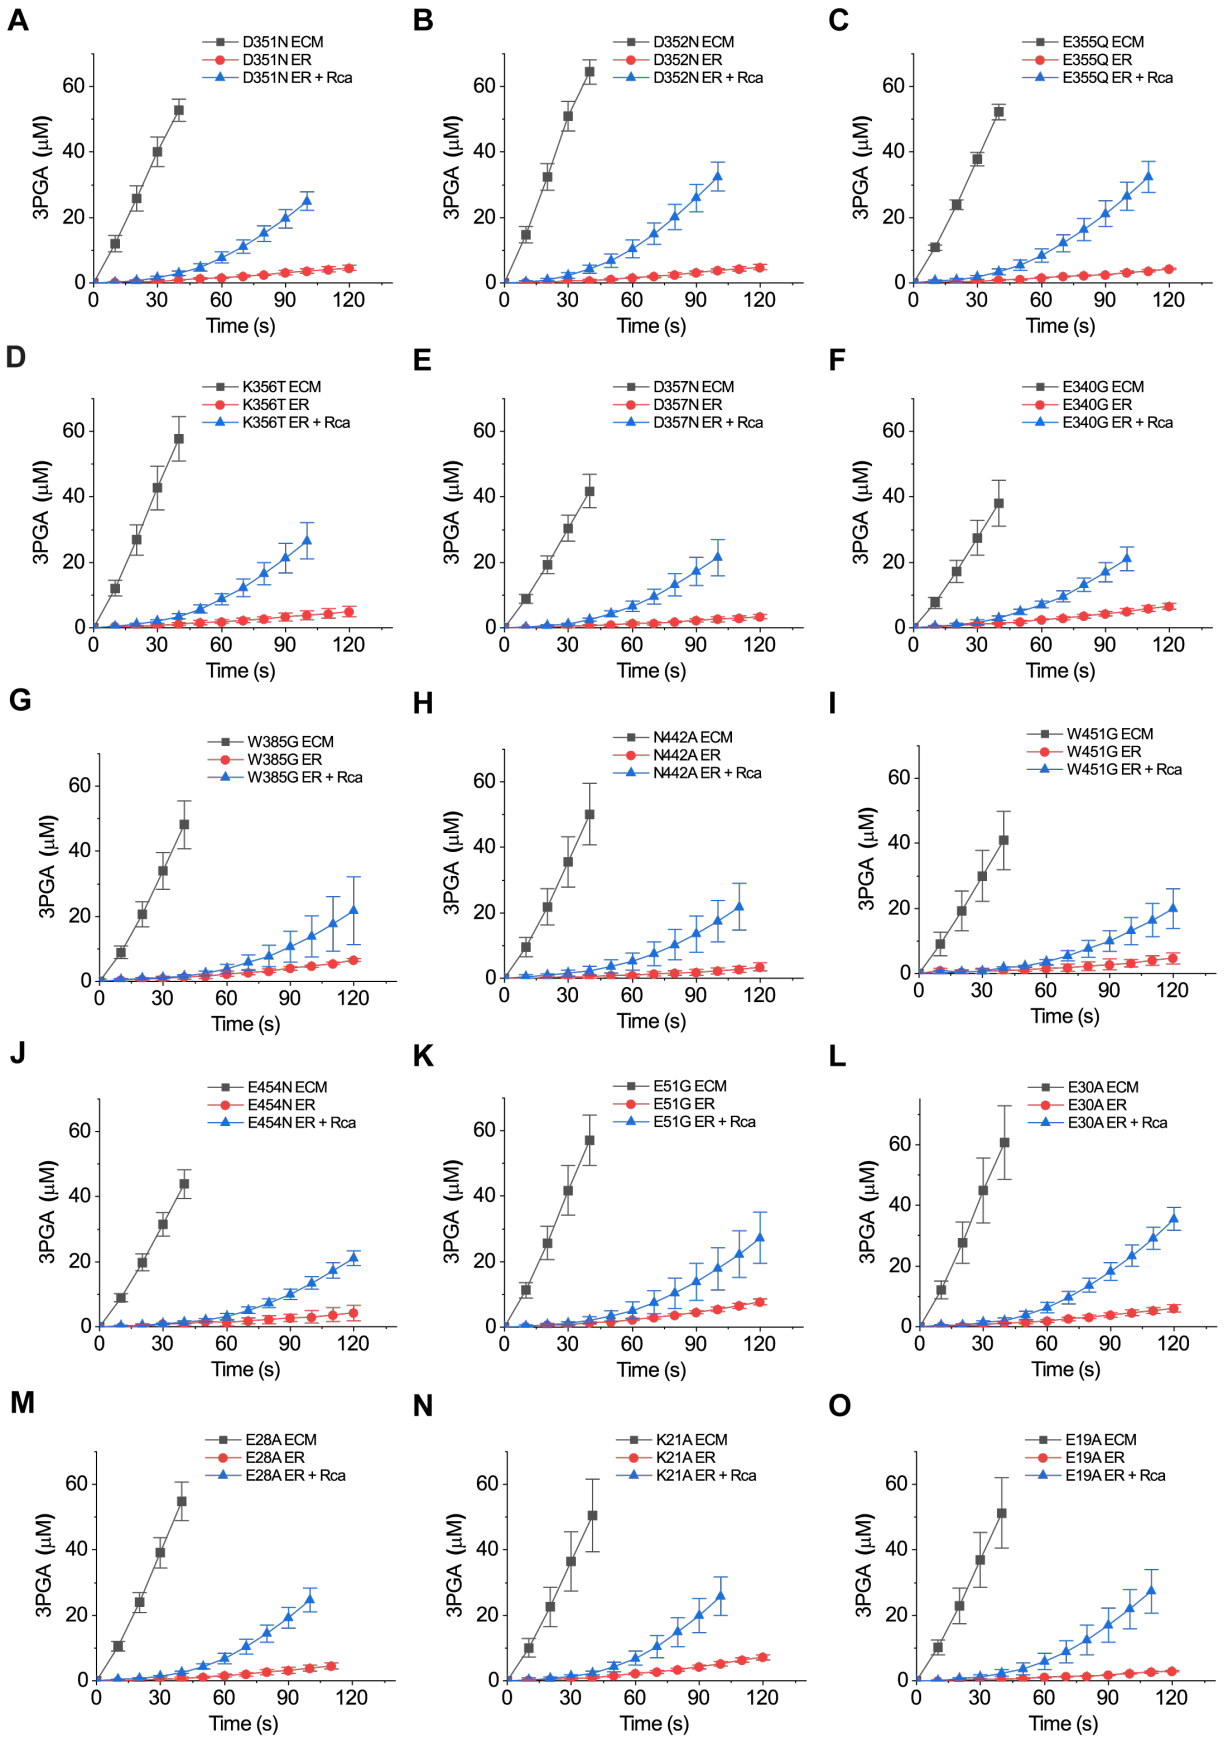

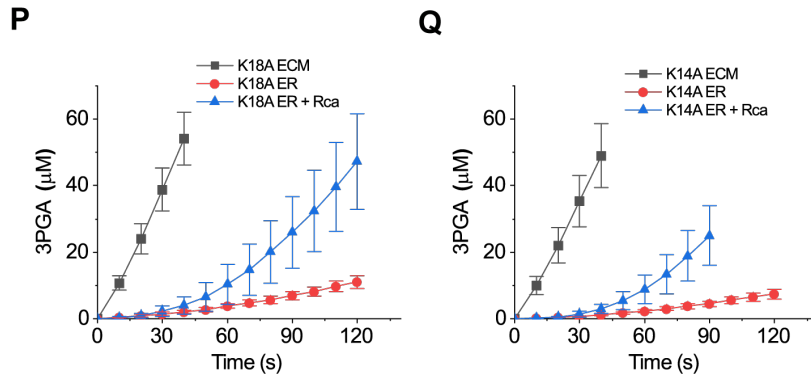

**Fig. S3. Rubisco activase assays of surface mutant variants.** Carboxylation time course data of activated Rubisco (ECM), inhibited Rubisco (ER), and inhibited Rubisco in the presence of wild type Arabidopsis activase (*AtRcaβ*) is shown for all mutants described in Fig. 2C.

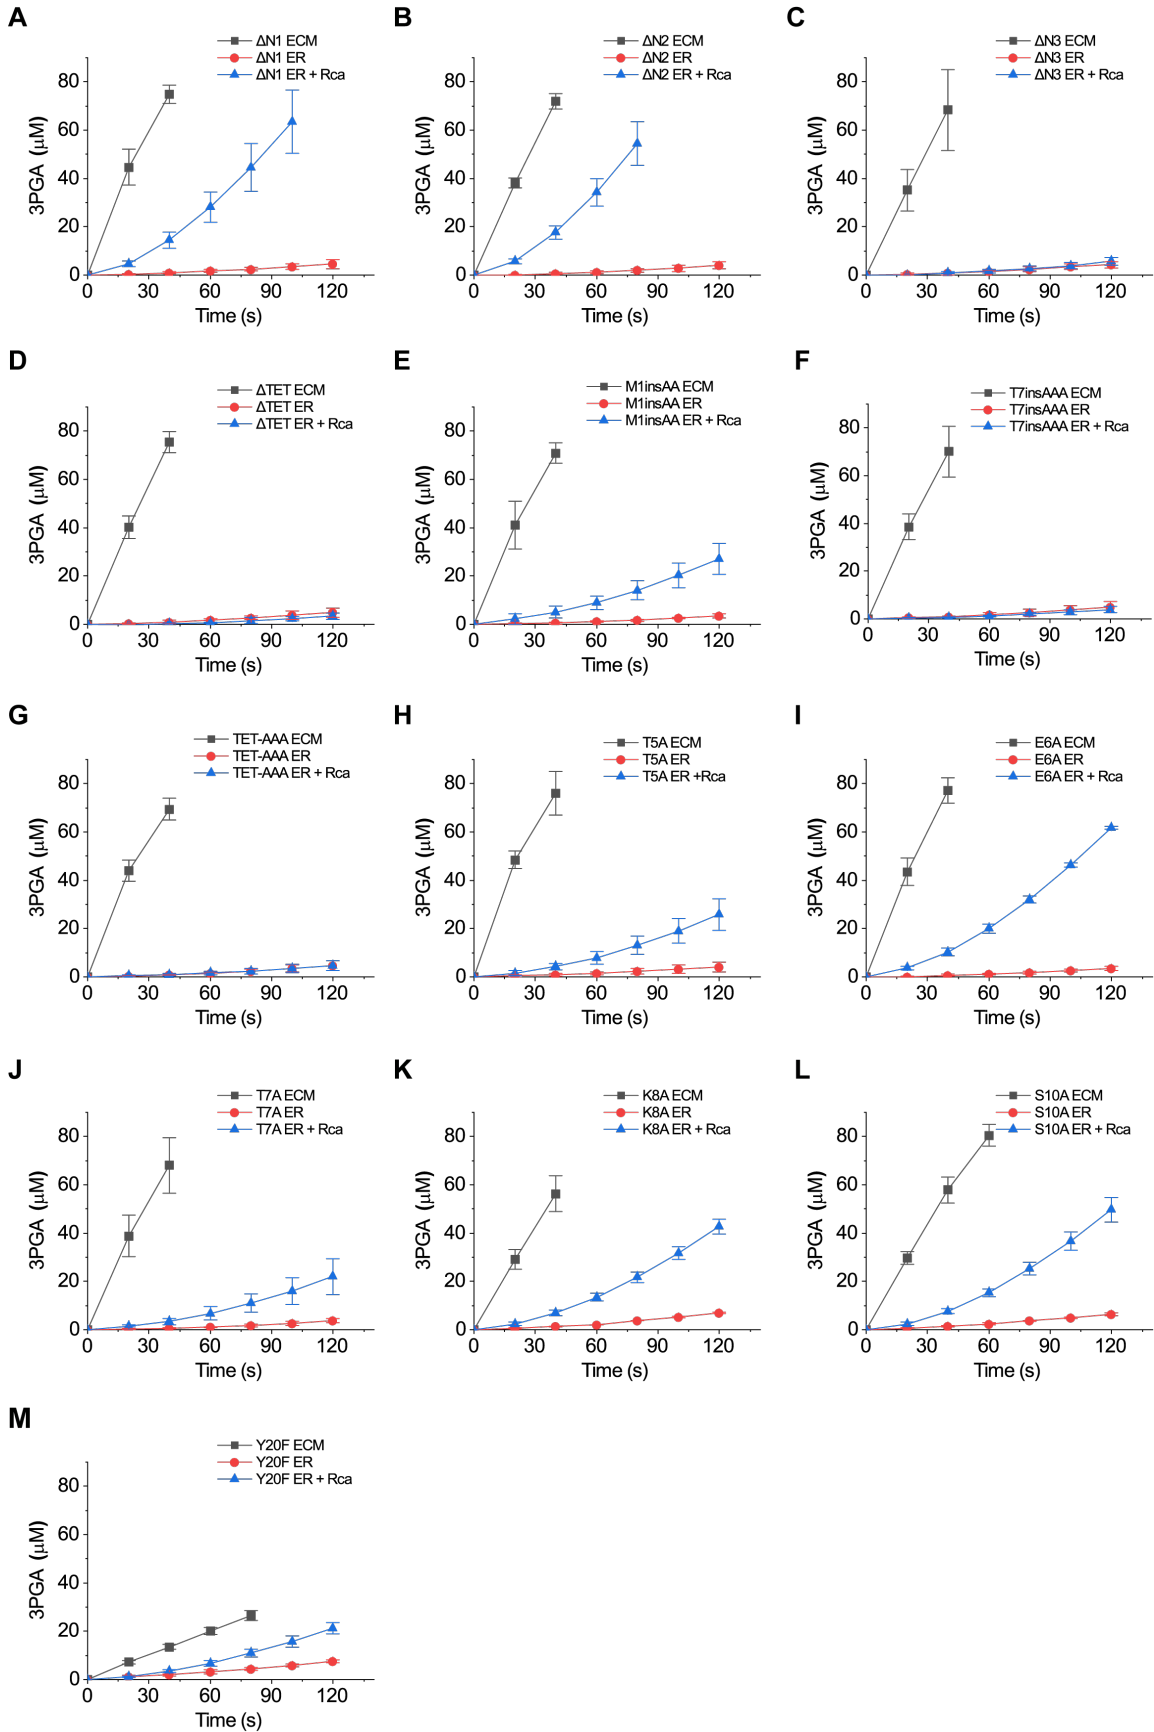

**Fig. S4. Rubisco activase assays of N-terminal mutant variants.** Carboxylation time course data of activated Rubisco (ECM), inhibited Rubisco (ER), and inhibited Rubisco in the presence of wild type Arabidopsis activase (*AtRcaβ*) are shown for all mutants described in Fig. 4A-B.

Table S1. Primers used in this study

| No. | Primer                                  | Sequence (5' to 3')                                    |
|-----|-----------------------------------------|--------------------------------------------------------|
| 1   | AtHLS E94K for                          | CCGTTCCAGGAGAAAAGACTCAATTTATTGC                        |
| 2   | AtHLS E94K rev                          | GCAATAAATTGAGTCTTTTCTCCTGGAACGG                        |
| 3   | AtHLS P89A for                          | TGCTACCACATCGAGGCCGTTCCAGGAGAA                         |
| 4   | AtHLS P89A rev                          | TTCTCCTGGAACGGCCTCGATGTGGTAGCA                         |
| 5   | AtHLS E51V for                          | GAGTTCCACCTGTAGAAGCAGGGGC                              |
| 6   | AtHLS E51V rev                          | GCCCCTGCTTCTACAGGTGGAACTC                              |
| 7   | AtHLS E28A for                          | GACTTACTATACTCCTGCATATGAAACCAAGG                       |
| 8   | AtHLS E28A rev                          | CCTTGTTTCATATGCAGGAGTATAGTAAGTC                        |
| 9   | AtHLS E30A for                          | ACTCCTGAATATGCAACCAAGGATACTG                           |
| 10  | AtHLS E30A rev                          | CAGTATCCTTGGTTGCATATTCAGGAGT                           |
| 11  | AtHLS $\Delta$ N7 dp for                | AAAGCAAGTGTTGGGTTCAAAGCTGGT                            |
| 12  | AtHLS $\Delta$ N7 dp rev                | CATATGTATATCTCCTTCTTAAAGTTAAACAAAATTATTCTAGAGGG        |
| 13  | AtHLS $\Delta$ N4 dp for (used with 12) | ACAGAGACTAAAGCAAGTGTTGGGT                              |
| 14  | AtHLS NinsAA dp for (used with 12)      | GCTGCATCACCACAAACAGAGACTAAAGCAAG                       |
| 15  | AtHLS $\Delta$ TET rev (used with 11)   | TTGTGGTGACATATGTATATCTCCTTCTTAAAGTTAAACAAAATTATTCTAGAG |
| 16  | AtHLS $\Delta$ N2 dp for (used with 12) | CAAACAGAGACTAAAGCAAGTGTTGGG                            |
| 17  | AtHLS $\Delta$ N1 dp for (used with 12) | CCACAAACAGAGACTAAAGCAAGTGTTG                           |
| 18  | AtHLS TETAAA dp for                     | AGCTAAAGCAAGTGTTGGGT                                   |
| 19  | AtHLS TETAAA dp rev                     | GCAGCTTGTGGTGACATATGTATATCTC                           |
| 20  | AtHLS 8insAAA dp for                    | GCAGCAGTCTCTGTTTGTGGTGACAT                             |
| 21  | AtHLS 8insAAA dp rev                    | AGCTAAAGCAAGTGTTGGGTTCAAAG                             |
| 22  | AtHLS T5A for                           | ATATGTCACCACAAGCAGAGACTAAAGCAAG                        |
| 23  | AtHLS T5A rev                           | CTTGCTTTAGTCTCTGCTTGTGGTGACATAT                        |

|    |                   |                                                     |
|----|-------------------|-----------------------------------------------------|
| 24 | AtHLS E6A for     | GTCACCACAAACAGCAACTAAAGCAAGTGTTG                    |
| 25 | AtHLS E6A rev     | CAACACTTGCTTTAGTTGCTGTTTGTGGTGAC                    |
| 26 | AtHLS T7A for     | GTCACCACAAACAGAGGCTAAAGCAAGTGTTG                    |
| 27 | AtHLS T7A rev     | CAACACTTGCTTTAGCCTCTGTTTGTGGTGAC                    |
| 28 | AtHLS K8A for     | CACAAACAGAGACTGCAGCAAGTGTTGGGTTC                    |
| 29 | AtHLS K8A rev     | GAACCCAACACTTGCTGCAGTCTCTGTTTGTG                    |
| 30 | AtHLS S10A for    | CAGAGACTAAAGCAGCAGTTGGGTTCAAAGCTG                   |
| 31 | AtHLS S10A rev    | CAGCTTTGAACCCAAGTCTGCTTTAGTCTCTG                    |
| 32 | AtHLS Y20F for    | GCTGGTGTTAAAGAGTTTAAATTGACTTACTATACTCC              |
| 33 | AtHLS Y20F rev    | GGAGTATAGTAAGTCAATTTAAACTCTTTAACACCAGC              |
| 34 | AtHLS Region1 for | TAAACTTGAAGGAGACGCGGCGTCAACTTTGGGCTTTG              |
| 35 | AtHLS Region1 rev | CAAAGCCCAAAGTTGACGCCGCGTCTCCTTCAAGTTTA              |
| 36 | AtHLS Region2 for | GCTTTGTTGATTTACTGCTCGCTGCTTCTGTTGAAAAAG<br>ATCGAAGC |
| 37 | AtHLS Region2 Rev | GCTTCGATCTTTTTCAACAGAAGCAGCGAGCAGTAAAT<br>CAACAAAGC |
| 38 | AtHLS Region3 for | GCGATGATTATGTTGCAAAGCTCGAAGCCGCGGTATC               |
| 39 | AtHLS Region3 Rev | GATACCGCGGCTTCGAGCTTTTGCAACATAATCATCGC              |
| 40 | AtHLS Region4 for | CATGCCTGCTTTGACCGCATCTTAGGAGATGATTCTGT<br>AC        |
| 41 | AtHLS Region4 Rev | GTACAGAATCATCTCCTAAGATCGCGGTCAAAGCAGGC<br>ATG       |
| 42 | AtHRcaS E454N for | CTTGCAAATGGAGTCCTCAACTAGCTGCTGCTTG                  |
| 43 | AtHRcaS E454N rev | CAAGCAGCAGCTAGTTGAGGACTCCATTTGCAAG                  |
| 44 | AtHLS D357N for   | GATTATGTTGAAAAAATCGAAGCCGCGG                        |
| 45 | AtHLS D357N rev   | CCGCGGCTTCGATTTTTTTTCAACATAATC                      |
| 46 | AtHLS E355Q for   | GCGATGATTATGTTCAAAAAGATCGAAGCCG                     |
| 47 | AtHLS E355Q rev   | CGGCTTCGATCTTTTTGAACATAATCATCGC                     |
| 48 | AtHLS D352N for   | GTTGATTTACTGCGCGATAATTATGTTGAAAAAGATCG              |

|    |                 |                                                |
|----|-----------------|------------------------------------------------|
| 49 | AtHLS D352N rev | CGATCTTTTTCAACATAATTATCGCGCAGTAAATCAAC         |
| 50 | AtHLS D351N for | GCTTTGTTGATTTACTGCGCAATGATTATGTTGAAAAAG<br>ATC |
| 51 | AtHLS D351N rev | GATCTTTTTCAACATAATCATTGCGCAGTAAATCAACAA<br>AGC |
| 52 | AtHLS E340G for | GAAGGAGACAGGGGGTCAACTTTGGG                     |
| 53 | AtHLS E340G rev | CCCAAAGTTGACCCCCTGTCTCCTTC                     |
| 54 | AtHLS E454N for | AAATGGAGTCCTCAACTAGCTGCTG                      |
| 55 | AtHLS E454N rev | CAGCAGCTAGTTGAGGACTCCATT                       |
| 56 | AtHLS W385G for | GGGTATTCACGTTGGGCACATGCCTGCT                   |
| 57 | AtHLS W385G rev | AGCAGGCATGTGCCCAACGTGAATACCC                   |
| 58 | AtHLS N442A for | GATCTTGCAGTCGAGGGTGCAGAAATTATCCGTGAAGC         |
| 59 | AtHLS N442A rev | GCTTACGGATAATTTCTGCACCCTCGACTGCAAGATC          |
| 60 | AtHLS W451A for | CGTGAAGCTTGCAAAGCAAGTCCTGAACTAGCT              |
| 61 | AtHLS W451A rev | AGCTAGTTCAGGACTTGCTTTGCAAGCTTCACG              |
